# Supplementary material
Source: publisher figshare collection journal article supplement (https://frontiersin.figshare.com/ndownloader/files/24743483)

## Experimental procedure for western GroE2 and ESAT-6

Western blot of 15µg of total lysate from each strain using monoclonal antibody against ESAT-6, confirming the different amounts of ESAT-6 in the different strains. Samples L7, L4, L3 and L5, full names on next page.

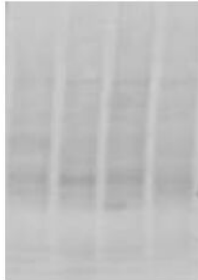

Stain-Free image of blot: 2020-07-09 22hr 17min

27sec\_stainfree\_blot2\_crop.tif

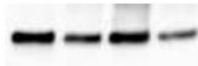

GroEL2 blot: 2020-07-10 14hr 08min 45sec\_GroEL2\_blot2\_crop.tif

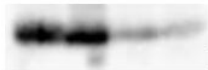

ESAT6 blot: 2020-07-10 15hr 31min 11sec\_ESAT6\_blot2\_crop.tif

From pptx-file

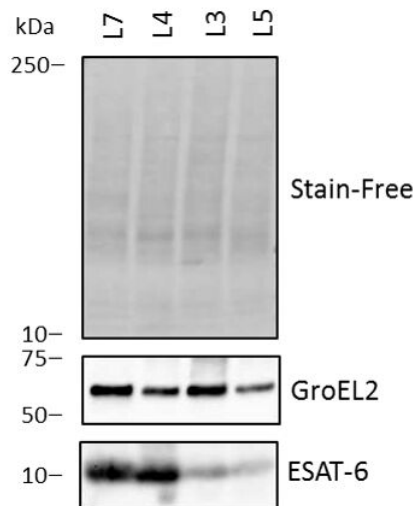

## Procedural details

Gel: Biorad Mini-protean TGX Stain-Free TGX gel, 4-20%, 12 well, 20 µl

Samples heated 5 min at 95°C in sample buffer with B-me before running.

Gel run 100V for 1h

Membrane: Trans blot turbo Transfer pack 0.2µm PVDF

Transfer: Trans blot turbo with TGX mini program.

Western buffer TBS-T: 10mM Tris pH=7.5, 150 mM NaCl, 0,05% TWEEN 20

Blocking: 8 hour TBS-T with 5% dry skimmed milk.

Primary antibody: ESAT-6 monoclonal antibody (11G4) from ThermoFisher Scientific.

Diluted 1:1000 in TBS-T with 5% milk. 2 hours at RT

Primary antibody: GroEL2 mouse monoclonal antibody (BDI578) from OriGene. Diluted

1:1000 in TBS-T with 5% milk. 1 hour at RT

Secondary antibody: Santa cruz SC-516102 m-IgGκ BP-HRP. Diluted 1:5000 in TBS-T with 5% milk, 1 hour

Detection: Reagent: ECL™ Prime Western Blotting System. Instrument: Chemidoc Touch with luminescence detection.

Washing: 3x10 min in TBS-T inbetween all steps and 6x in the last step detection.

Samples: The same set of samples as used for MS. Values measured previously did show not very good normalization on stainfree last time. Remeasured all samples in triplicates and redid normalization. Looks a bit better.

Many of original triplicates are empty. Choose 2 pr strain and performed western twice on each sample. Linage 5 have only 1 sample left.

Normalization control 1: The gel includes a stain that stains tryptophan. When activated the stain follows the protein over to the blot and can be used to see the uniformity of transfer and that the amount of each sample loaded is similar. Usually performs better than antibodies against housekeeping proteins for detection abnormalities. <http://www.bio-rad.com/en-no/applications-technologies/stain-free-imaging-technology>

Normalization control 2: GroEL2. Suggested normalization control from reviewer. Data from Shewit indicates that GroEL2 expression is fairly even between the samples from different strains.

| L3_R1   | L3_R2   | L3_R3   | L4_R1   | L4_R2   | L4_R3   | L5_R1   | L5_R2   | L5_R3   | L7_R1   | L7_R2   | L7_R3   | ANOVA Significant | Gene IDs | Rv numbers | Protein name                     |
|---------|---------|---------|---------|---------|---------|---------|---------|---------|---------|---------|---------|-------------------|----------|------------|----------------------------------|
| 31.8406 | 30.8106 | 31.8175 | 33.8277 | 32.8139 | 33.0329 | 30.7138 | 29.3106 | 31.2281 | 31.0303 | 32.2728 | 31.9699 | +                 | esaA     | Rv3875     | 6kDaearlysecretoryantigen/target |
| 32.8521 | 31.7818 | 32.9579 | 34.5643 | 35.0665 | 34.5858 | 31.3436 | 32.6899 | 32.9058 | 31.0984 | 32.0254 | 31.8199 | +                 | esaB     | Rv5874     | ESAT-6-likeproteinEsxB           |
| 27.9841 | 27.572  | 27.161  | 28.8839 | 27.9088 | 27.7387 | 25.4928 | 24.7967 | 25.5955 | 24.9304 | 25.7163 | 24.3028 | +                 | esaG     | Rv0287     | ESAT-6-likeproteinEsxG           |
| 29.6348 | 30.573  | 30.3252 | 31.4877 | 30.5495 | 30.7203 | 30.5413 | 28.6818 | 30.3368 | 28.4883 | 28.8753 | 28.6261 | +                 | esaK     | Rv1197     | ESAT-6-likeproteinEsxK           |
| 27.7125 | 28.7966 | 29.0845 | 29.1172 | 28.9041 | 29.2346 | 29.8633 | 30.1318 | 30.3464 | 27.7096 | 28.1557 | 28.0868 | +                 | esaN     | Rv1793     | ESAT-6-likeproteinEsxN           |
| 30.549  | 28.4295 | 31.0802 | 31.3861 | 31.6704 | 31.4056 | 22.1105 | 25.9042 | 25.8639 | 26.2084 | 29.4717 | 29.363  | +                 | esaO     | Rv2948c    | ESAT-6-likeproteinEsxO           |
| 32.7361 | 32.5972 | 32.5027 | 32.233  | 32.4687 | 32.5158 | 32.5691 | 33.0725 | 33.0217 | 33.0056 | 33.7943 | 33.6425 |                   | groEL1   | Rv3417c    | 6kDachaperonin1                  |
| 35.9857 | 35.732  | 35.7815 | 35.1439 | 35.565  | 35.7813 | 34.9638 | 35.8048 | 35.6871 | 35.9977 | 36.277  | 36.6587 |                   | groEL2   | Rv0440     | 6kDachaperonin2                  |

Blot cut in half so that high molecular weight probed with GroEL2 antibody and low molecular weight probed with ESAT6 antibody

- A) Stain-free image of the blot confirming that similar amounts of each sample is loaded on the gel and transferred to the blot.
- B) Western blot of 15µg of total lysate from each strain using monoclonal antibody against ESAT-6, confirming the different amounts of ESAT-6 in the different strains.
- C) Western blot of 15µg of total lysate from each strain using monoclonal antibody against GroEL2 confirming similar loading.

### Sample Naming

| Strain                            | Short name |
|-----------------------------------|------------|
| SOL.101 (22.12.14) 1              | L3-1 EMPTY |
| SOL.101 (22.12.14) 2              | L3-2       |
| SOL.101 (22.12.14) 3              | L3-3       |
| ESP 471.1 (22.12.14) 1            | L4-1       |
| ESP 471.1 (22.12.14) 2            | L4-2       |
| ESP 471.1 (22.12.14) 3            | L4-3       |
| M. Africanum (22.12.14) 1         | L5-1 EMPTY |
| M. Africanum (22.12.14) 2         | L5-2       |
| M. Africanum (22.12.14) 3         | L5-3 EMPTY |
| L7 #28 (according to Alemayehu) 1 | L7-1       |
| L7 #28 (according to Alemayehu) 2 | L7-2       |
| L7 #28 (according to Alemayehu) 3 | L7-3       |

Gels and blots:

| Lane | Gel1 and Gel2 identical                    |
|------|--------------------------------------------|
| 1    | Biorad Precision Plus Dual color 5 $\mu$ l |
| 2    | Biorad unstained Precision plus 20 $\mu$ l |
| 3    | L7-3                                       |
| 4    | L4-1                                       |
| 5    | L3-2                                       |
| 6    | L5-3                                       |
| 7    | Biorad unstained Precision plus 20 $\mu$ l |
| 8    | L7-2                                       |
| 9    | L4-2                                       |
| 10   | L3-3                                       |
| 11   | L5-3                                       |
| 12   | Biorad unstained Precision plus 20 $\mu$ l |

2020-07-09 21hr 40min 10sec\_stainfree\_gel\_1

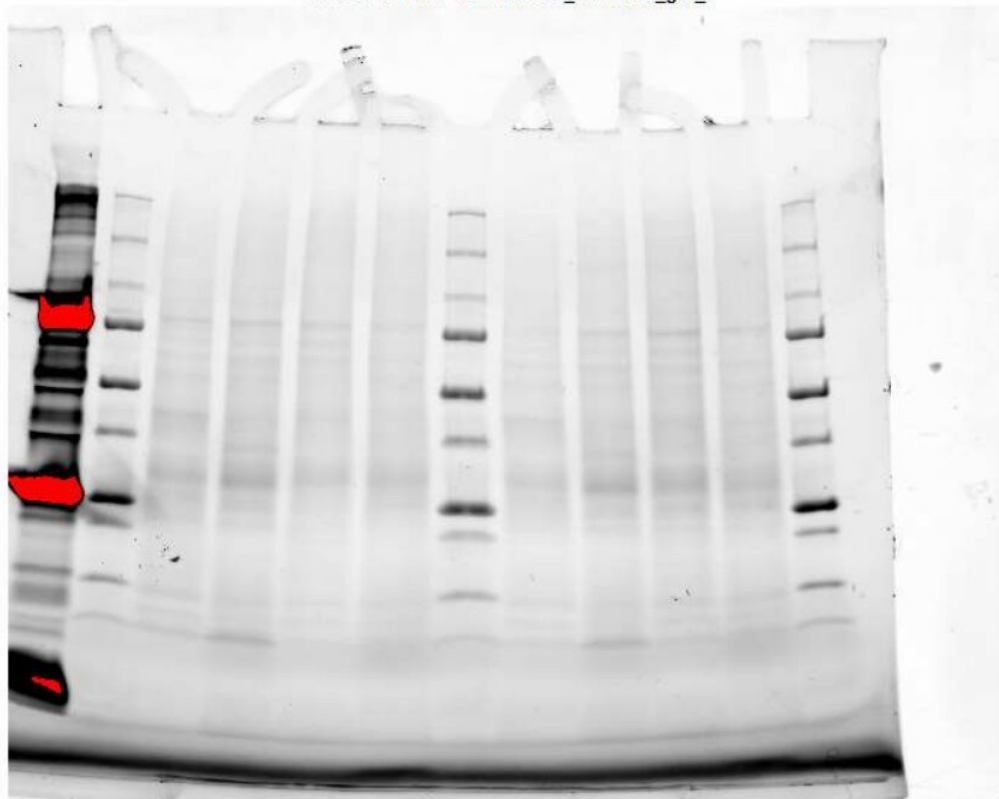

2020-07-09 21hr 55min 06sec\_stainfree\_gel\_2

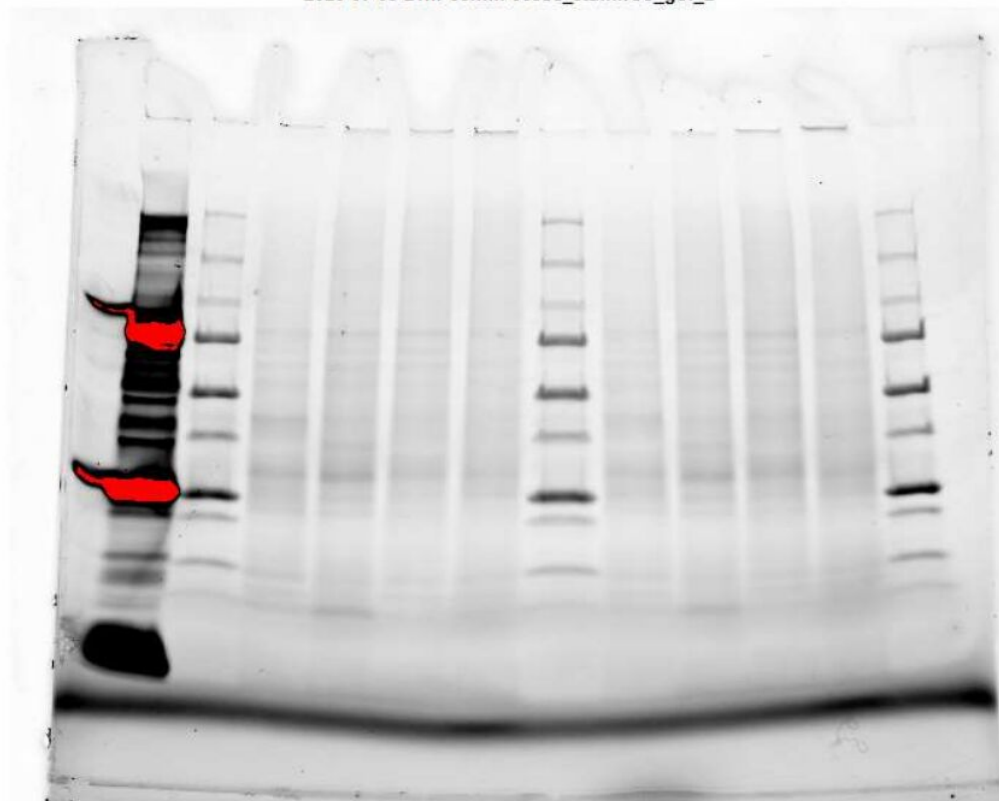

2020-07-09 22hr 08min 15sec\_stainfree\_blot1

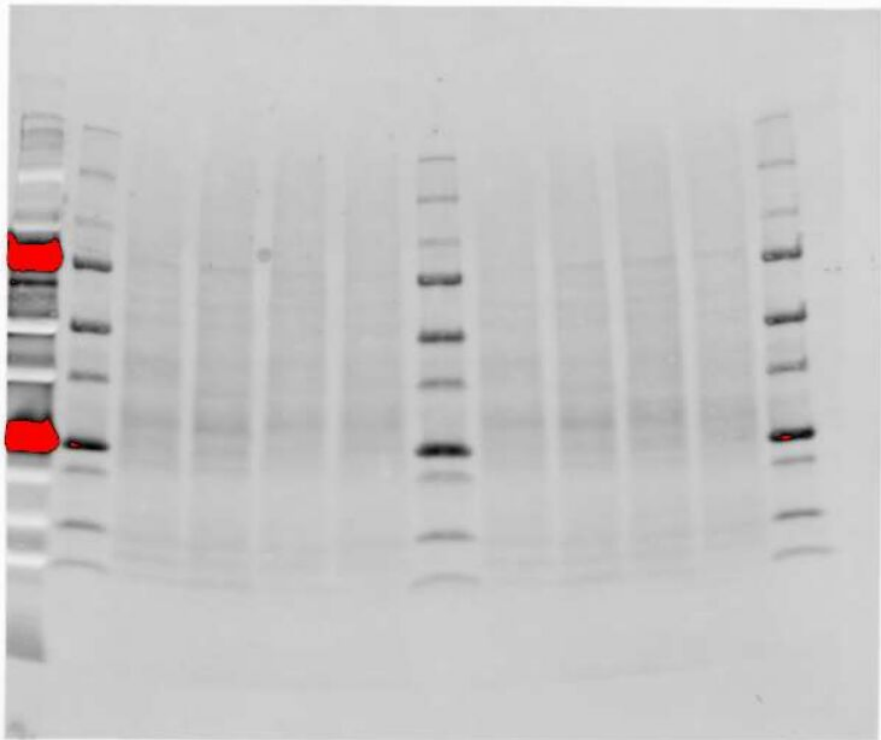

2020-07-09 22hr 17min 27sec\_stainfree\_blot2

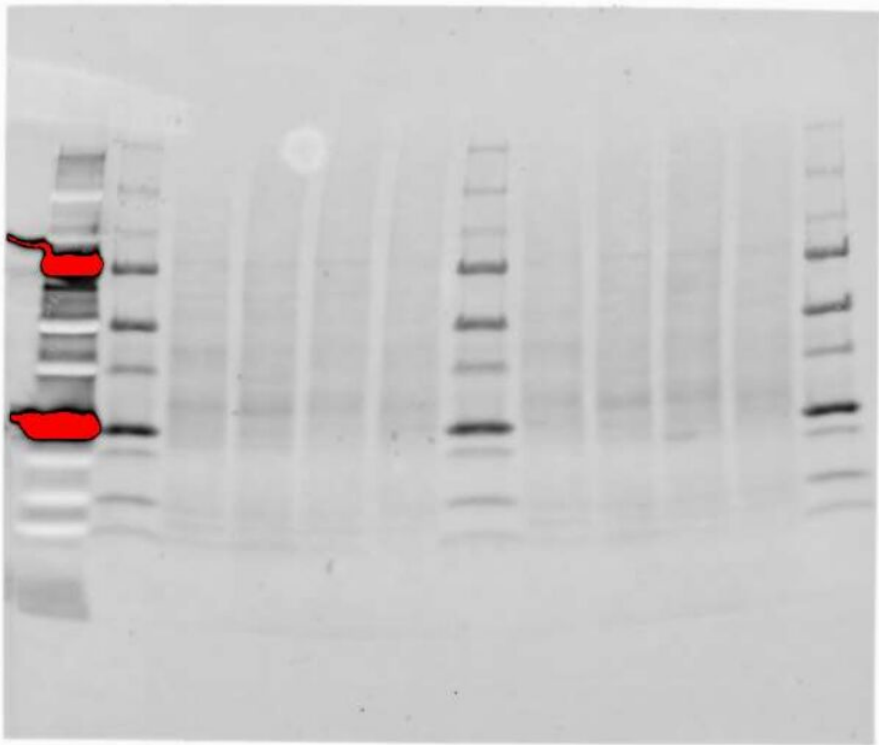

2020-07-10 13hr 52min 32sec\_GroEL2\_blot1

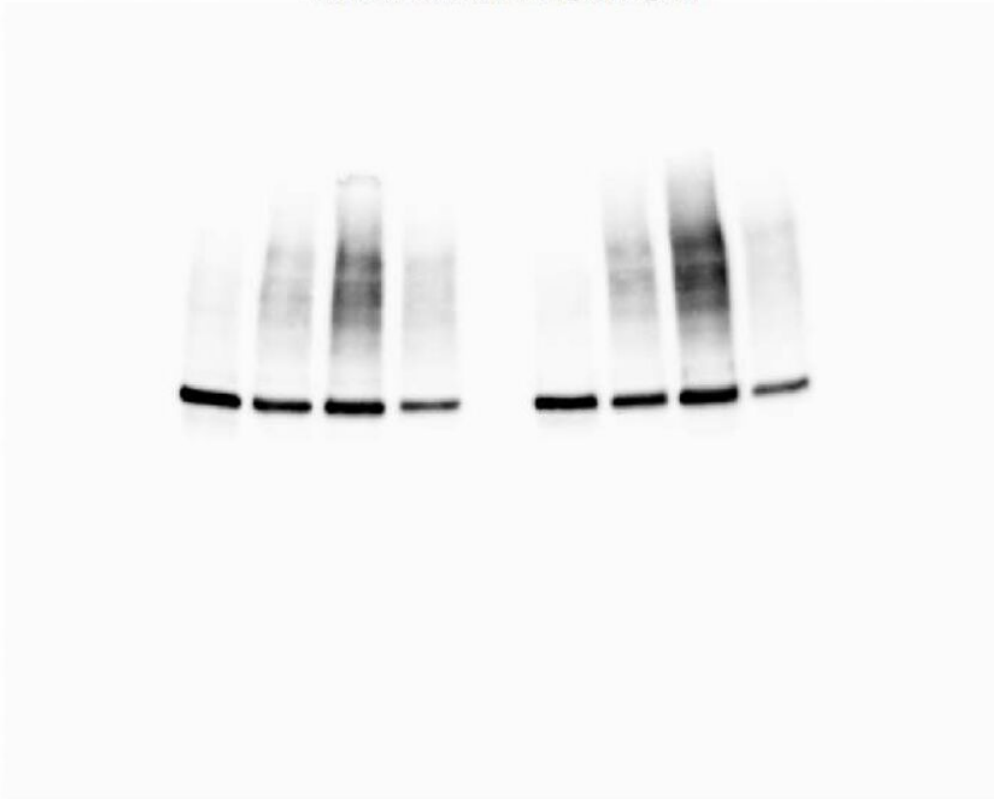

2020-07-10 15hr 01min 33sec\_ESAT6\_blot1

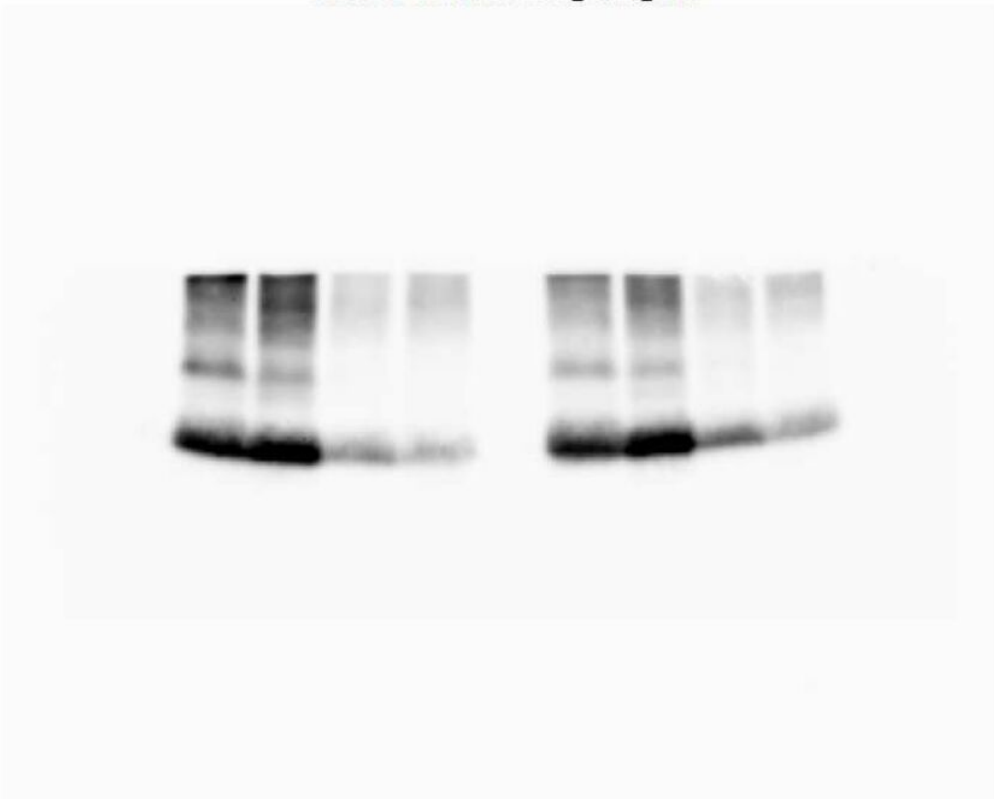



2020-07-10 14hr 08min 45sec\_GroEL2\_blot2

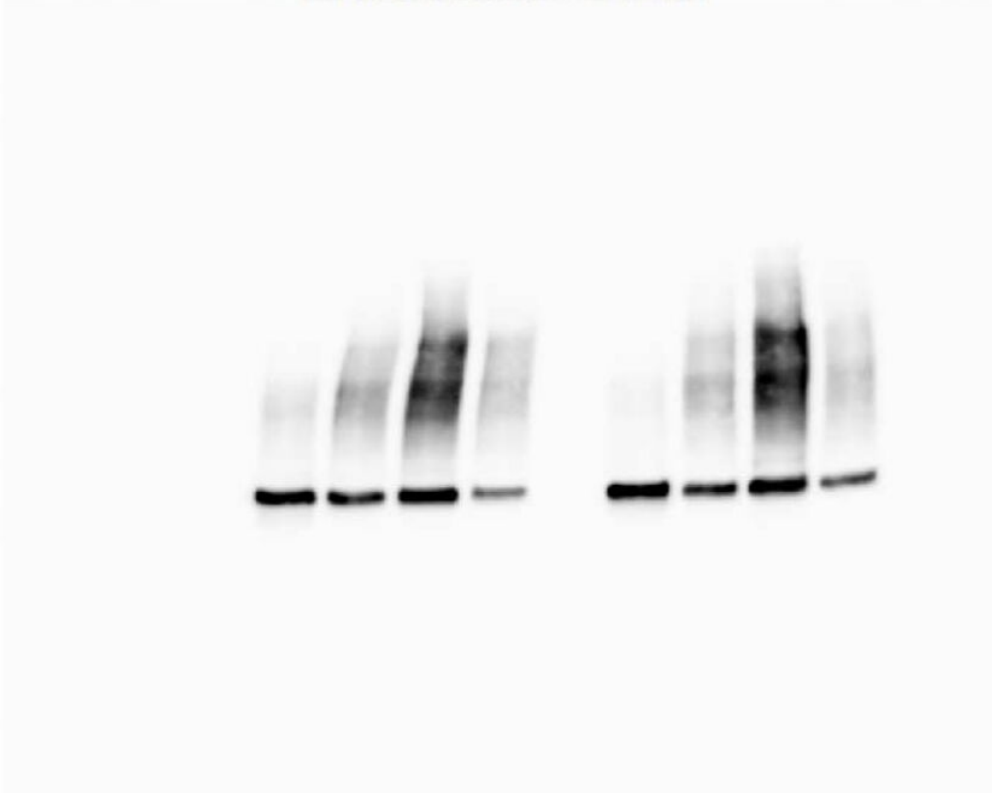

2020-07-10 15hr 31min 11sec\_ESAT6\_blot2

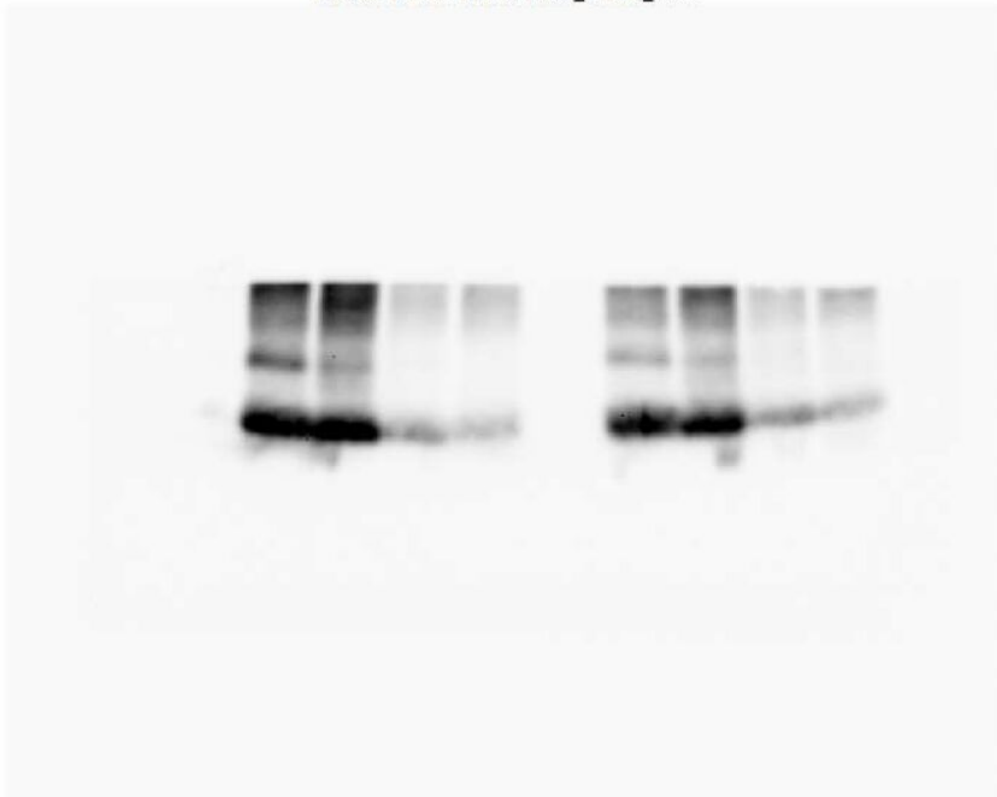

Supplement: Supplementary file [file 24743483]
